# Supplementary material for: Development of a Single Nucleotide Polymorphism Barcode to Genotype Plasmodium vivax Infections
Source: PLoS Negl Trop Dis. 2015 Mar 17;9(3):e0003539. doi: 10.1371/journal.pntd.0003539 (PMC4362761; doi:10.1371/journal.pntd.0003539)
Supplement: S3 Table — The PCR efficiency and the detection limit of both the alternate and reference allele is listed for each assay in the 42-SNP barcode. All assays were performed in duplicate. (XLSX) [file pntd.0003539.s005.xlsx]

## Sheet: S3 Table 
Assay	Efficiency	r2	Limit of Detection Total DNA (ng/µl)
2	91.33 ± 0.03%	0.999	0.03
6	94.34 ± 0.03%	0.975	0.03
9	90.33 ± 0.04%	0.999	0.03
10	90.15 ± 0.07%	0.998	0.03
11	90.76 ± 0.04%	0.999	0.03
12	94.54 ± 0.06%	0.998	0.03
13	95.37 ± 0.04%	0.999	0.03
14	92.08 ± 0.50%	0.998	0.03
15	95.19 ± 0.03%	1	0.03
16	90.89 ± 0.05%	0.999	0.03
17	90.00 ± 0.40%	0.999	0.03
21	98.11 ± 0.08%	0.996	0.03
22	93.24 ± 0.07%	0.998	0.03
23	90.57 ± 0.04%	0.999	0.03
24	97.89 ± 0.07%	0.999	0.03
25	91.78 ± 0.10%	0.998	0.03
26	98.76 ± 0.07%	0.999	0.03
27	99.03 ± 0.10%	0.995	0.03
28	94.23 ± 0.02%	0.999	0.03
29	90.81 ± 0.02%	1	0.03
31	90.83 ± 0.10%	0.995	0.03
33	91.03 ± 0.03%	0.999	0.03
35	98.36 ± 0.07%	0.999	0.03
37	98.36 ± 0.16%	1	0.03
38	95.21 ± 0.01%	1	0.03
40	96.54 ± 0.03%	0.999	0.03
1	91.89 ± 0.07%	0.999	0.3
3	90.88 ± 0.06%	0.999	0.3
4	90.55 ± 0.08%	0.998	0.3
5	97.98 ± 0.07%	0.998	0.3
7	97.51 ± 0.04%	0.999	0.3
8	90.83 ± 0.05%	0.999	0.3
18	95.08 ± 0.03%	1	0.3
19	91.61 ± 0.03%	0.996	0.3
20	90.13 ± 0.07%	0.998	0.3
30	97.51 ± 0.04%	1	0.3
32	92.49 ± 0.09%	0.996	0.3
34	99.99 ± 0.03%	1	0.3
36	96.54 ± 0.10%	0.995	0.3
39	99.21 ± 0.03%	1	0.3
41	94.84 ± 0.02%	1	0.3
42	94.83 ± 0.04%	0.999	0.3
